# Supplementary material
Source: HighWire-hosted journal article supplement (https://www.annfammed.org/highwire/filestream/8021/field_highwire_adjunct_files/0/KaufmanSupFig_1.pdf)
Supplement: KaufmanSupFig_1.pdf [file KaufmanSupFig_1.pdf]

## Online Supplementary Material

Kaufman A, Powell W, Alfero C. Health extension in New Mexico: an academic health center and the social determinants of disease. *Ann Fam Med.* 2010;8(1):73-81.

<http://www.annfammed.org/cgi/content/full/8/1/73/DC1>

### Supplemental Figure 1. Office for Community Health: county health report card.

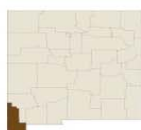

## Hidalgo County

Lordsburg, Cotton City, Animas, Playas, Cloverdale, Virden

### BACKGROUND DATA

| Quick Facts                               | Hidalgo County | New Mexico |
|-------------------------------------------|----------------|------------|
| Land area (square miles)                  | 3,446          | 121,356    |
| Population (2006 est.)                    | 5,087          | 1,954,599  |
| Persons per square mile (2000)            | 1.7            | 15.0       |
| Median household income (2004)            | \$23,702       | \$37,838   |
| Persons below poverty, percent, 2004      | 21.2%          | 16.7%      |
| Unemployment rate (November 2007)         | 2.2%           | 3.2%       |
| <b>High School Dropout Rate 2005-2006</b> |                |            |
| Animas Public Schools                     | 1.0%           | 4.9%       |
| Lordsburg Municipal Schools               | 8.2%           |            |

### Legislative Districts

**House**  
Dist. 38, Rep. Dianne Miller Hamilton  
Dist. 39, Rep. Rodolpho "Rudy" Martinez

**Senate**  
Dist. 35, Sen. John Arthur Smith

### LEADING CAUSES OF DEATH

| Rates per 100,000                  | Hidalgo County | New Mexico |
|------------------------------------|----------------|------------|
| Diseases of the heart              | 156.2          | 176.8      |
| Cancer                             | 150.9          | 159.2      |
| Accidents (unintentional injuries) | 105.5          | 61.3       |
| Chronic lower respiratory diseases | 26.0           | 45.5       |
| Cerebrovascular disease            | 116.9          | 33.1       |
| Diabetes mellitus                  | 49.8           | 32.0       |

### Healthcare Clinics and Resources

**Hidalgo Medical Services**  
500 E DeMoss Street • Lordsburg NM 88045 • 505-542-8384  
Provides primary care services.

**Animas Valley Clinic (Hidalgo Medical Services)**  
PO Box 85 • Animas NM 88020 • 505-548-2299  
Provides primary care services.

### Lic. Health Professionals (Jan. 2008)

|                                                 |    |
|-------------------------------------------------|----|
| MD/DO Total per Licensing Board:                | 1  |
| MDs:                                            | 1  |
| DOs:                                            | 0  |
| Nurse Practitioners:                            | 1  |
| Physician Assistants:                           | 1  |
| Occupational Therapists:                        | 0  |
| Physical Therapists:                            | 0  |
| Dentists:                                       | 2  |
| <b>Nursing (NM Board of Nursing Statistics)</b> |    |
| Total Nurses:                                   | 18 |
| Registered Nurses:                              | 12 |
| Licensed Practical Nurses:                      | 6  |
| Certified Nurse Midwives (per NM DOH):          | 0  |

Licensed Midwives (per NM DOH): 0  
Pharmacists: (4/08) 1  
**Current Provider vacancies, Hidalgo County (Jan. 2008):** Total 3  
(Physician 2; CNM 1)

### Comprehensive Health Planning Council Priority Needs of Hidalgo County (2007)

- Substance Abuse
- Teen pregnancy
- Suicide Prevention
- Family Resiliency
- Emergency Preparedness

### Community Environmental Health Concerns

- Trains: Air pollution, Noise, Safety
- Ground Water Quality/hx of hazardous waste, nitrate, fluoride
- Waste Disposal; Illegal dumping
- Hazardous Material Disposal: concerns about increase cancer
- Border Concerns: Drugs, alien traffic

### HSC ACTIVITIES IN HIDALGO COUNTY (2007)

#### Education

- 1 UNM SOM student &/or resident grad practicing in county (UNM SOM Location Report '07)
- 2 Student/resident months supported by Area Health Education Center
- 13 Emergency Medical Services grads from the county
- 2 Months med student Community Immersion Experience w/ community preceptor

#### Services Provided to County

- 0.3 Specialty Extension Services days provided in 2007
- 79 calls to the New Mexico Poison Center in FY07
- 12 Pediatric Outreach Clinic hours provided (FY07)
- Department of Psychiatry / Center for Rural & Community Behavioral Health:
  - 100 Child & Adolescent Telepsychiatry consults in 2007
- 6 County residents served at UNM Cancer Research & Treatment Center (FY07)
- 174 total Hidalgo County patient visits at UNM Hospitals and Clinics (FY07):
  - 31 Charity Care
  - 38 Uninsured
  - 136 Compensated Care
- \$25,226 in uncompensated costs for care to Hidalgo County residents (FY07)
